# Supplementary material for: Defining the vaccination window for respiratory syncytial virus (RSV) using age-seroprevalence data for children in Kilifi, Kenya
Source: PLoS One. 2017 May 22;12(5):e0177803. doi: 10.1371/journal.pone.0177803 (PMC5439681; doi:10.1371/journal.pone.0177803)
Supplement: S1 Data — (XLS) [file pone.0177803.s001.xls]

## Sheet: Notes
	Defining the vaccination window for respiratory syncytial virus using age-seroprevalence data for children in Kilifi, Kenya
	S1 Data
	The rows of the data correspond to one study participant.
	Variable	Description
	age_months	Age in months of the study participant at the time of sample collection
	LRTI	A binary variable indicating if the participant was positive for a lower respiratory tract infection
	RSV	A binary variable indicating if the participant was RSV antigen positive
	rsv_av_logau	The titre level for RSV antibodies

## Sheet: Raw_data
age_months	LRTI	RSV	rsv_av_logau
0.722793	1	0	2.32
0.229979	0	0	2.312
0	0	0	2.072
0	0	0	2.809
0.62423	1	0	2.299
0.0985626	0	0	2.765
0.0328542	0	0	2.987
0.0328542	0	0	2.005
0	0	0	2.29
0.0657084	0	0	2.873
0.0328542	0	0	2.878
0.197125	0	0	2.665
0.0328542	0	0	2.366
0	0	0	2.748
0	0	0	2.981
0.164271	0	0	3.2655
0.0657084	0	0	2.663
0.591376	0	0	2.9545
0.919918	1	0	2.195
0.328542	0	0	2.458
0	0	0	3.017
0	0	0	1.787
0.0328542	0	0	2.575
0	0	0	2.251
0	0	0	2.625
0.262834	0	0	2.561
0.0328542	0	0	2.21
0.591376	0	0	2.917
0.0985626	0	0	3.1465
0	0	0	2.685
0.0985626	0	0	2.998
0	0	0	3.1515
0.0985626	0	0	3.01
0.0657084	0	0	3.111
0.427105	0	0	2.823
0.262834	0	0	2.05
0.0328542	0	0	2.536
0.525667	0	1	2.2695
0.657084	0	1	2.037
0.0985626	0	0	2.811
0.591376	0	0	2.263
0.262834	0	0	2.406
0	0	0	2.463
0	0	0	2.798
0	0	0	1.875
0.0657084	1	0	2.826
0	0	0	1.724
0	0	0	1.91
1.60986	1	0	1.8
1.08419	1	0	2.28
1.70842	1	1	2.271
1.51129	1	0	1.986
1.87269	0	0	2.458
1.1499	0	0	2.721
1.60986	0	0	2.176
1.18275	1	0	2.532
1.31417	1	0	2.026
1.83984	1	0	2.717
1.41273	0	0	2.232
1.9384	1	1	2.537
1.87269	1	1	2.534
1.28131	1	1	2.246
1.18275	1	0	2.195
1.83984	1	0	1.855
1.1499	0	0	2.597
1.9384	1	0	1.991
1.31417	0	0	0.705
1.01848	0	0	1.947
1.44559	1	0	2.263
1.31417	0	0	2.674
1.64271	0	0	1.887
1.74127	1	0	2.348
1.60986	0	0	1.036
1.41273	1	1	1.895
1.87269	0	0	2.346
1.77413	1	0	0.951
1.60986	0	0	2.5225
1.18275	0	0	2.531
1.01848	0	0	2.335
1.18275	0	0	2.276
1.01848	0	0	3.1935
1.11704	0	0	2.817
1.9384	1	0	1.788
1.28131	1	0	2.524
1.80698	0	0	2.8755
1.31417	1	0	2.58
1.90554	1	0	0.802
1.44559	1	0	2.495
1.54415	1	1	2.298
1.80698	1	1	2.135
1.18275	1	0	2.342
1.28131	1	0	2.645
1.08419	1	0	2.595
1.21561	1	0	2.127
1.28131	0	0	2.72
1.9384	1	0	2.78
2.89117	1	1	1.212
2.75975	1	0	1.294
2.03696	1	0	2.066
2.62834	0	0	1.95
2.75975	1	0	1.597
2.13552	1	0	2.615
2.82546	0	0	1.335
2.92402	1	0	0.945
2.26694	0	0	1.921
2.29979	0	0	2.157
2.23409	1	0	2.663
2.79261	1	0	2.306
2.56263	1	1	2.274
2.29979	1	1	2.502
2.95688	1	0	1.403
2.7269	0	0	2.28
2.95688	1	0	1.907
2.82546	1	0	2.103
2.26694	1	0	3.141
2.82546	1	0	2.163
2.56263	1	0	1.81
2.33265	1	0	1.324
2.29979	1	0	2.512
2.56263	1	0	2.223
2.79261	1	0	1.41
2.98973	1	0	1.561
2.52977	1	0	2.931
2.89117	1	1	1.482
2.06982	0	0	2.3355
2.69405	0	0	2.8645
2.29979	1	0	1.014
2.95688	1	0	1.867
2.16838	1	0	1.97
2.75975	0	0	1.91
2.56263	1	0	1.9205
2.29979	1	0	2.397
2.13552	1	1	0.932
2.16838	1	1	2.194
2.79261	1	1	2.011
2.52977	1	1	0.976
2.69405	1	0	2.056
2.66119	1	0	2.013
2.92402	1	1	1.554
2.06982	1	0	2.745
2.82546	1	0	2.102
2.23409	1	0	1.848
2.3655	1	0	2.267
2.92402	1	1	1.237
3.71253	1	1	1.947
3.97536	1	0	2.185
3.67967	0	0	1.7675
3.8768	1	0	1.657
3.81109	0	0	1.276
3.58111	0	0	2.205
3.71253	0	0	1.7345
3.05544	1	0	1.8
3.97536	1	0	1.868
3.67967	1	0	1.821
3.38398	1	1	1.93
3.21971	1	1	1.834
3.71253	1	0	1.26
3.02259	1	1	1.977
3.48255	1	0	0.997
3.12115	1	0	1.209
3.31828	1	0	1.803
3.61396	0	0	1.925
3.05544	1	0	2.111
3.35113	1	0	2.8415
3.48255	1	0	1.962
3.18686	1	0	2.079
3.90965	0	0	1.077
3.71253	0	0	1.22
3.05544	0	0	1.7825
3.64682	0	0	2.011
3.94251	1	0	2.406
3.58111	1	0	2.009
3.12115	1	0	2.002
3.81109	1	0	2.2685
3.41684	0	0	1.001
3.84394	1	0	2.283
3.71253	1	0	1.893
3.71253	1	0	2.293
3.38398	0	0	1.636
3.21971	1	0	1.913
3.154	1	1	1.142
3.154	1	0	0.476
3.84394	1	0	0.706
3.5154	1	1	1.022
3.21971	1	1	1.825
3.74538	0	0	1.8455
3.41684	1	0	2.04
3.58111	1	0	1.329
3.21971	1	0	2.318
3.0883	1	0	1.969
3.5154	1	0	1.9
3.71253	1	0	1.156
4.69815	0	0	1.104
4.99384	1	0	0.893
4.13963	1	1	1.765
4.69815	0	0	1.58
4.82957	0	0	1.6385
4.43532	1	0	1.234
4.59959	1	0	0.99
4.69815	1	0	1.6995
4.92813	1	0	1.984
4.13963	0	0	1.914
4.89528	1	0	1.714
4.36961	1	0	1.857
4.33676	1	0	2.097
4.00821	1	1	2.038
4.43532	1	0	1.816
4.46817	0	0	1.9955
4.76386	0	0	2.002
4.00821	0	0	1.9775
4.20534	0	0	0.978
4.92813	0	0	1.25
4.56674	1	0	0.828
4.79671	1	0	1.4225
4.69815	1	0	1.216
4.00821	0	0	1.122
4.63244	1	1	1.086
4.43532	1	1	1.051
4.76386	1	0	1.133
4.36961	1	1	0.9445
4.76386	0	0	1.6955
4.17248	1	0	2.006
4.40246	0	0	1.881
4.53388	0	0	1.171
4.27105	1	0	1.026
4.23819	1	0	0.581
4.96099	0	0	1.743
4.76386	1	0	1.1305
4.50103	1	1	2.368
4.00821	1	1	1.5315
4.40246	1	1	0.974
4.23819	0	0	1.078
4.33676	0	0	0.929
4.82957	0	0	1.072
4.76386	1	0	1.903
4.82957	0	0	1.204
4.59959	1	0	1.104
4.50103	0	0	1.718
4.89528	1	0	1.089
4.10678	1	1	1.195
5.55236	1	0	1.067
5.0924	1	0	1.937
5.61807	1	0	1.341
5.42094	0	0	1.756
5.38809	0	0	1.109
5.78234	0	0	1.637
5.42094	0	0	1.277
5.8809	0	0	2.943
5.28953	0	0	1.25
5.8152	0	0	1.15
5.02669	1	1	1.609
5.51951	1	1	1.807
5.84805	1	1	1.493
5.68378	1	1	1.391
5.02669	1	0	0.907
5.05955	0	0	1.997
5.55236	0	0	1.14
5.0924	0	0	1.259
5.02669	0	0	1.734
5.35524	1	0	1.689
5.51951	1	0	1.624
5.55236	1	0	1.042
5.78234	0	0	1.015
5.91376	1	0	1.594
5.71663	0	0	0.931
5.42094	1	0	1.097
5.38809	1	0	1.444
5.65092	0	0	1.0795
5.0924	0	0	0.9975
5.94661	1	0	1.2165
5.71663	1	0	1.825
5.51951	0	0	1.097
5.05955	1	0	1.303
5.55236	1	1	0.983
5.97947	1	0	0.957
5.68378	1	0	0.837
5.4538	0	0	0.706
5.35524	1	1	0.856
5.71663	0	0	1.827
5.19097	0	0	0.903
5.51951	0	0	1.156
5.25667	1	0	1.359
5.8152	1	0	0.738
5.97947	0	0	0.806
5.84805	0	0	0.792
5.78234	0	0	1.109
5.12526	1	0	1.401
5.55236	1	1	0.726
6.80082	1	0	2.013
6.11088	1	0	0.772
6.99795	1	1	0.725
6.2423	1	0	1.208
6.57084	1	0	1.379
6.76797	1	0	1.534
6.2423	1	0	0.744
6.40657	1	0	1.845
6.17659	1	0	1.014
6.17659	0	0	1.316
6.04517	0	0	1.764
6.99795	0	0	1.589
6.89938	1	1	1.192
6.93224	1	1	0.952
6.99795	1	0	1.991
6.30801	1	0	2.423
6.40657	0	0	1.187
6.80082	0	0	0.866
6.93224	0	0	0.69
6.50513	1	0	1.356
6.6694	0	0	1.047
6.76797	1	0	1.096
6.73511	1	0	1.664
6.93224	1	0	1.329
6.01232	1	1	0.991
6.99795	1	1	1.017
6.89938	0	0	1.024
6.86653	0	0	1.584
6.34086	0	0	1.348
6.11088	1	0	1.503
6.43942	0	0	0.962
6.93224	0	0	2.7145
6.96509	1	0	1.024
6.83368	0	0	0.902
6.83368	1	0	0.704
6.37372	1	0	0.503
6.89938	0	0	2.07
6.37372	1	0	0.873
6.14374	0	0	0.935
6.53799	1	0	1.176
6.93224	0	0	0.618
6.07803	0	0	1.233
6.04517	0	0	1.144
6.43942	1	0	0.705
6.6694	1	0	0.777
6.80082	1	0	0.815
6.50513	1	0	1.225
6.11088	0	0	0.861
7.91786	1	0	0.787
7.06365	1	1	0.746
7.09651	1	1	0.8
7.22793	1	1	0.966
7.3922	1	0	2.998
7.06365	1	0	2.382
7.75359	0	0	1.077
7.3922	0	0	0.701
7.75359	1	0	0.785
7.42505	0	0	0.965
7.45791	0	0	2.4815
7.09651	0	0	1.933
7.45791	1	0	2.73
7.3922	0	0	2.024
7.98357	1	0	0.866
7.85216	0	0	2.36
7.58932	0	0	1.263
7.85216	0	0	1.216
7.91786	0	0	1.88
7.72074	1	0	0.854
7.19507	1	0	0.904
7.55647	0	0	1.161
7.29363	0	0	2.603
7.16222	0	0	1.386
7.19507	1	1	1.271
7.19507	0	0	0.857
7.95072	0	0	1.178
7.19507	0	0	1.738
7.26078	0	0	1.511
7.72074	1	0	1.837
7.91786	0	0	0.889
7.88501	0	0	0.918
7.49076	0	0	1.707
7.32649	0	0	1.073
7.49076	1	0	1.046
7.19507	0	0	0.891
7.52361	1	0	0.65
7.26078	1	0	1.467
7.29363	0	0	1.653
7.8193	0	0	0.708
7.3922	0	0	1.601
7.29363	1	1	2.613
7.62218	1	0	1.045
7.58932	0	0	0.793
7.65503	1	0	2.234
7.55647	0	0	1.81
7.29363	0	0	2.455
7.26078	0	0	1.238
8.08214	0	0	0.738
8.1807	0	0	1.896
8.80493	1	0	2.462
8.1807	0	0	2.632
8.6078	0	0	1.083
8.27926	0	0	3.815
8.41068	0	0	0.905
8.9692	1	0	1.553
8.80493	0	0	1.493
8.1807	0	0	1.666
8.73922	0	0	2.957
8.90349	0	0	2.186
8.83778	0	0	1.34
8.57495	0	0	1.344
8.1807	1	1	1.046
8.34497	0	0	1.885
8.34497	0	0	1.375
8.57495	0	0	1.785
8.83778	0	0	1.217
8.73922	0	0	1.204
8.44353	0	0	0.778
8.34497	0	0	1.252
8.64066	0	0	1.309
8.34497	0	0	1.015
8.04928	0	0	0.856
8.67351	1	0	0.77
8.83778	0	0	0.86
8.31211	0	0	0.9145
8.04928	0	0	2.3
8.77207	0	0	2.3475
8.77207	0	0	1.171
8.9692	1	0	1.289
8.64066	0	0	1.925
8.1807	0	0	1.601
8.01643	1	0	1.598
8.50924	1	1	0.928
8.6078	1	0	1.307
8.73922	1	0	0.692
8.57495	0	0	0.603
8.70637	0	0	2.64
8.70637	1	0	0.762
8.14784	0	0	0.656
8.08214	0	0	1.169
8.27926	1	0	0.787
8.54209	0	0	1.797
8.77207	1	0	0.873
8.83778	0	0	0.84
8.80493	0	0	0.838
9.72485	0	0	1.804
9.19918	0	0	2.489
9.26489	0	0	0.985
9.59343	1	0	0.931
9.7577	0	0	1.85
9.95483	0	0	1.71
9.3963	0	0	0.618
9.29774	0	0	0.692
9.29774	0	0	1.184
9.29774	1	0	1.398
9.92197	1	0	2.09
9.10062	1	0	2.37
9.72485	1	0	1.332
9.06776	1	0	2.076
9.95483	1	0	1.061
9.98768	0	0	2.158
9.59343	0	0	1.977
9.98768	0	0	1.9635
9.23203	0	0	0.827
9.06776	0	0	0.699
9.3306	1	0	1.016
9.56057	0	0	1.034
9.49487	1	0	1.314
9.3963	1	0	1.141
9.52772	1	1	0.893
9.3306	1	0	0.926
9.3963	0	0	2.2805
9.82341	0	0	1.6535
9.92197	1	0	2.464
9.06776	0	0	2.104
9.49487	0	0	1.963
9.52772	1	0	1.141
9.49487	0	0	1.907
9.52772	0	0	0.913
9.98768	1	0	2.227
9.69199	1	0	0.949
9.7577	0	0	2.13
9.7577	0	0	0.754
9.72485	1	1	0.648
9.46201	0	0	0.705
9.79055	1	0	0.569
9.92197	0	0	0.801
9.69199	0	0	2.384
9.56057	0	0	2.328
9.19918	1	0	2.241
9.10062	0	0	0.737
9.06776	1	0	0.91
9.52772	1	0	0.648
10.0862	1	0	1.029
10.6119	1	0	0.661
10.2834	0	0	2.2595
10.6448	0	0	0.937
10.3491	0	0	2.34
10.1191	0	0	1.088
10.6448	0	0	2.3055
10.809	0	0	0.672
10.0534	1	0	2.0375
10.3162	1	0	1.266
10.5462	0	0	1.814
10.6448	0	0	1.925
10.0205	1	1	1.3065
10.3491	1	1	0.919
10.8419	0	0	0.767
10.809	0	0	0.795
10.0205	1	0	1.748
10.5462	1	0	0.909
10.4476	0	0	0.701
10.3491	0	0	0.779
10.0862	0	0	2.022
10.809	0	0	1.992
10.7433	0	0	0.971
10.3162	1	0	1.141
10.0205	1	0	1.61
10.6776	0	0	1.824
10.7105	0	0	0.707
10.8419	1	0	2.0245
10.3491	0	0	1.019
10.5462	0	0	2.1285
10.2834	0	0	2.248
10.0534	0	0	0.584
10.3819	1	0	2.197
10.9733	0	0	2.4465
10.7762	0	0	0.916
10.7105	0	0	1.075
10.1848	0	0	1.1645
10.7433	1	0	1.135
10.0862	1	0	2.182
10.7105	1	0	0.756
10.3491	0	0	0.715
10.2177	0	0	1.833
10.5791	1	0	2.3855
10.7433	0	0	1.278
10.8747	0	0	0.701
10.1191	0	0	0.888
10.8747	0	0	0.743
10.0534	1	1	0.606
11.8932	0	0	0.912
11.2361	0	0	1.2185
11.8275	0	0	1.422
11.7618	1	0	1.005
11.8932	1	0	2.31
11.499	0	0	2.308
11.1704	0	0	1.131
11.499	0	0	1.278
11.1376	0	0	1.198
11.1047	0	0	1.331
11.4004	0	0	1.629
11.0062	1	0	0.747
11.5318	0	0	1.875
11.3018	0	0	1.84
11.4004	0	0	1.894
11.1704	0	0	2.545
11.8275	0	0	0.932
11.1376	1	0	1.104
11.2361	0	0	1.567
11.039	1	0	0.776
11.4333	1	0	0.91
11.3347	1	0	0.867
11.1704	0	0	2.382
11.8275	1	0	1.274
11.0719	0	0	1.228
11.5975	1	0	0.643
11.3347	0	0	0.81
11.5647	0	0	1.016
11.5318	0	0	2.439
11.3018	0	0	1.5565
11.0719	0	0	2.062
11.9589	0	0	1.399
11.3347	1	0	2.847
11.3347	0	0	1.12
11.4004	0	0	2.462
11.9918	1	0	2.729
11.4004	0	0	1.2305
11.4004	1	0	1.701
11.4661	1	0	1.638
11.3018	0	0	0.769
11.5647	0	0	2.425
11.1704	0	0	0.739
11.0062	0	0	1.41
11.0719	0	0	0.811
11.2361	0	0	1.848
11.6632	0	0	2.113
11.9261	1	0	0.841
11.2361	0	0	0.712
12.4517	0	0	2.195
12.9774	1	0	2.794
12.8131	1	0	1.847
12.7803	0	0	1.021
12.3532	0	0	2.633
12.6489	1	0	1.124
12.386	0	0	0.992
12.7474	1	0	1.782
12.3532	1	0	1.211
12.3532	0	0	1.621
12.4846	1	0	2.8895
12.3532	0	0	2.209
12.3203	0	0	1.162
12.9446	1	0	0.707
12.4189	1	0	1.818
12.2546	0	0	0.586
12.7474	0	0	1.925
12.5503	0	0	0.941
13.306	0	0	2.676
13.8973	0	0	2.794
13.076	0	0	2.471
13.2731	0	0	0.926
13.963	0	0	1.937
13.6674	0	0	1.73
13.5031	0	0	2.52
13.2402	0	0	1.044
13.9302	0	0	2.571
13.1745	0	0	0.901
13.2731	0	0	0.916
13.2402	1	0	0.649
13.7331	0	0	2.169
13.3388	0	0	2
13.0103	1	0	0.923
13.9959	0	0	0.946
13.6674	0	0	1.113
13.8316	1	0	1.481
13.1417	0	0	0.774
13.7988	0	0	1.675
13.4702	1	0	0.741
14.6858	0	0	2.411
14.5216	0	0	1.487
14.5544	0	0	1.977
14.2259	0	0	1.742
14.423	1	0	0.853
14.5544	0	0	0.958
14.3901	0	0	0.725
14.1602	0	0	2.059
14.5873	0	0	1.779
15.1786	0	0	1.519
15.9343	0	0	1.406
15.8357	1	0	2.485
15.6057	0	0	2.9
15.5729	1	0	0.894
15.5729	0	0	2.187
15.0144	0	0	2.651
15.7372	0	0	1.992
15.7372	1	0	2.885
15.8029	0	0	2.0965
15.7372	1	0	1.027
15.7372	0	0	0.967
15.0144	0	0	0.903
15.3429	1	0	2.421
15.0472	0	0	0.744
15.7372	0	0	1.1465
15.9343	0	0	0.813
15.3429	0	0	2.217
15.2772	0	0	1.584
15.6715	1	1	0.909
16.8871	1	0	2.325
16.3285	0	0	0.835
16.2957	0	0	2.25
16.8542	0	0	1.794
16.7885	1	1	0.717
16.0329	0	0	1.051
16.7228	0	0	0.901
16.4271	0	0	1.089
16.6571	1	0	2.369
16.5914	0	0	2.095
16.6571	1	0	0.918
16	0	0	1.844
16.2957	0	0	0.986
17.347	0	0	2.612
17.1499	1	0	0.593
17.8727	0	0	2.12
17.807	0	0	2.552
17.4127	0	0	2.909
17.1828	0	0	2.256
17.4784	0	0	1.061
17.577	0	0	0.96
17.0185	0	0	0.841
17.3142	1	0	2.394
17.2156	0	0	2.647
17.2813	1	0	2.301
17.0185	0	0	1.633
17.577	1	0	0.818
17.4127	0	0	2.137
18.7598	0	0	1.709
18.4312	1	0	2.008
18.8255	0	0	3.381
18.037	0	0	0.872
19.2197	0	0	2.454
19.8439	1	0	2.428
19.0554	1	0	1.172
19.5483	0	0	2.264
19.6468	0	0	1.93
19.0554	0	0	1.701
19.7125	0	0	2.086
19.7782	0	0	2.107
19.154	0	0	2.327
19.4497	0	0	0.912
19.0226	1	0	2.381
20.3039	1	0	1.231
20.5339	0	0	2.248
20.5667	0	0	2.292
20.9938	0	0	2.384
20.2053	0	0	2.275
20.271	0	0	1.354
20.6324	1	0	2.267
20.6653	1	1	2.506
20.9938	0	0	2.003
21.848	0	0	2.566
21.4538	0	0	1.848
21.191	0	0	2.2085
21.3552	0	0	2.976
21.8809	0	0	2.367
21.2567	0	0	2.105
21.2895	0	0	2.015
21.7495	1	0	2.24
21.7495	0	0	1.97
22.6037	0	0	2.711
22.9651	0	0	1.035
22.6366	0	0	2.816
22.4723	1	0	1.99
22.0452	0	0	2.232
22.4394	0	0	2.313
22.4723	0	0	2.709
22.6037	0	0	2.764
23.885	0	0	2.866
23.3922	1	0	2.512
23.0637	0	0	2.022
23.9836	0	0	3.4425
23.2608	0	0	0.584
23.1294	0	0	0.74
23.885	1	0	2.772
24.5421	0	0	2.16
24.0493	0	0	2.698
24.1478	0	0	1.758
24.3121	1	0	2.238
24.2793	0	0	1.3375
24.0821	0	0	2.644
25.3634	0	0	2.652
25.692	0	0	2.638
25.8234	0	0	2.9805
25.8563	0	0	1.315
25.4949	0	0	1.696
26.5791	0	0	3.229
26.8747	0	0	1.912
26.0205	1	0	3.717
26.6119	0	0	1.2425
26.2834	1	0	2.7805
26.4476	0	0	2.362
27.5975	0	0	2.606
27.1376	1	0	2.877
27.7947	0	0	2.276
27.7618	1	0	2.852
27.1376	0	0	1.7635
27.3018	1	0	2.36
27.499	1	0	1.516
28.9117	0	0	2.145
28.8789	0	0	2.713
28.846	0	0	2.944
28.5832	0	0	2.984
28.6489	1	0	2.039
29.1417	0	0	2.884
29.076	0	0	1.89
29.1417	1	0	2.905
29.3388	0	0	2.256
30.2587	1	0	2.715
31.8357	0	0	3.57
31.2772	1	0	2.652
32.3614	1	0	2.547
32.5257	0	0	1.7385
32.4271	0	0	1.9935
33.6099	1	0	2.414
33.4127	0	0	2.626
33.4456	0	0	1.945
34.5955	0	0	2.061
34.694	0	0	2.364
34.6283	0	0	2.052
35.9754	0	0	2.012
35.3511	0	0	1.746
35.7782	0	0	2.4675
36.0082	0	0	2.376
36.271	0	0	2.173
36.961	1	0	1.699
37.7823	0	0	2.849
37.8809	1	0	2.6
38.8994	0	0	1.914
38.7023	0	0	2.161
38.7023	0	0	2.827
39.4579	0	0	1.7405
39.1622	1	0	3.113
39.4251	0	0	2.529
39.8522	0	0	2.969
40.5749	0	0	2.669
40.5749	0	0	2.71
41.692	0	0	2.742
41.1335	0	0	2.466
42.2505	0	0	3.766
42.7433	1	0	3.452
42.4148	0	0	3.298
42.2505	0	0	2.589
43.3018	0	0	1.503
43.9918	1	0	2.307
44.0246	0	0	2.829
44.0246	0	0	2.305
44.7803	0	0	2.128
45.3388	0	0	1.565
46.1273	0	0	2.677
46.423	0	0	2.659
47.1786	0	0	3.183
47.7043	0	0	2.294
47.1458	0	0	2.327
48.6899	0	0	2.08
49.5441	0	0	2.403
49.6427	0	0	2.061
49.7084	0	0	2.806
50.4312	0	0	3.211
51.9754	0	0	2.703
52.8624	0	0	2.938
52.8624	0	0	2.387
52.1068	0	0	2.0175
52.501	0	0	3.066
52.6982	0	0	2.467
53.4867	0	0	2.606
56.7064	0	0	2.543
56.115	0	0	2.356
57.1006	0	0	2.81
57.5606	0	0	1.607
59.8604	0	0	2.803
60.9774	0	0	1.936
60.3203	0	0	2.759
62.2259	1	0	2.527
62.653	0	0	2.838
63.3429	0	0	2.44
63.4743	0	0	3.152
63.5729	0	0	2.965
63.1129	0	0	2.164
64.0329	0	0	2.68
65.9055	0	0	2.53
66.3326	0	0	2.195
67.5154	0	0	2.152
67.4825	0	0	1.947
67.0226	0	0	2.813
67.3183	0	0	2.759
67.154	0	0	2.778
69.191	0	0	2.45
70.8665	0	0	2.881
70.9322	0	0	3.044
72.3121	0	0	2.149
72.8706	0	0	2.9795
72.2793	1	0	2.633
73.0021	0	0	2.653
73.8234	1	0	3.085
73.3963	0	0	2.76
73.0349	0	0	1.928
73.4292	0	0	2.64
73.232	0	0	2.133
73.4949	0	0	1.638
74.9405	0	0	2.052
75.6632	0	0	2.496
76.3203	0	0	2.791
76.8789	1	0	2.937
76.6489	1	0	2.602
77.4702	0	0	2.539
78.883	0	0	2.363
78.0616	1	0	3.223
79.2444	0	0	2.725
79.3429	1	0	2.877
79.2115	1	0	2.827
79.3101	0	0	3.322
79.9671	0	0	3.156
80.9199	0	0	2.076
81.807	0	0	2.237
81.7413	0	0	2.137
82.8255	0	0	3.138
82.5955	0	0	2.07
83.2526	0	0	2.406
84.2382	0	0	2.669
84.961	0	0	3.05
84.6653	0	0	2.9145
85.7495	0	0	1.968
85.5524	1	0	2.841
85.5852	0	0	2.504
86.5051	0	0	2.971
86.2094	0	0	2.658
86.4394	0	0	2.756
87.7864	0	0	1.722
87.1951	0	0	2.415
87.3593	0	0	3.022
87.8522	0	0	2.219
87.8193	0	0	2.665
88.4107	0	0	2.166
88.9035	0	0	2.283
88.7064	0	0	2.718
89.4292	0	0	2.696
89.462	1	0	2.46
90.6448	1	0	2.613
91.7947	0	0	2.678
91.269	0	0	2.989
91.9261	0	0	2.526
92.616	0	0	2.043
92.2546	0	0	2.8455
92.9446	0	0	2.908
93.2731	0	0	2.687
93.5031	1	0	2.465
94.8501	0	0	1.772
96.5257	0	0	2.451
97.7413	1	0	2.534
98.6612	0	0	2.769
99.4825	0	0	2.717
99.0554	0	0	2.211
100.567	0	0	2.857
100.797	0	0	2.9695
101.388	0	0	2.779
101.848	0	0	3.143
101.947	0	0	2.279
102.078	0	0	2.699
103.097	0	0	2.854
104.575	0	0	2.908
105.659	0	0	1.566
105.988	0	0	3.3985
105.298	0	0	1.779
107.006	0	0	2.878
107.17	0	0	2.345
107.926	0	0	2.166
109.733	0	0	2.935
109.503	0	0	1.969
109.569	0	0	3.147
109.372	0	0	2.53
110.029	1	0	2.158
110.259	0	0	2.608
111.704	0	0	2.878
112.066	0	0	2.988
114.333	0	0	2.783
114.825	0	0	2.982
114.267	0	0	3.5075
114.431	0	0	2.851
114.628	0	0	2.992
114.103	0	0	2.924
115.647	0	0	3.16
115.877	0	0	3.1515
116.14	0	0	3.2675
117.782	0	0	2.262
117.454	0	0	2.8805
118.932	0	0	2.808
120.411	0	0	2.3995
120.049	0	0	1.9175
121.331	0	0	2.549
122.842	0	0	2.586
123.17	0	0	2.735
123.663	0	0	2.491
124.912	0	0	2.312
124.419	0	0	2.648
124.616	0	0	3.043
124.945	0	0	3.1305
125.963	0	0	2.717
125.667	0	0	2.837
125.24	0	0	2.923
125.7	0	0	2.421
126.686	0	0	3.084
127.409	0	0	2.933
127.441	0	0	2.566
128.033	0	0	2.714
128.723	0	0	2.617
129.446	0	0	2.189
132.83	0	0	1.97
132.041	0	0	2.296
133.191	0	0	3.379
136.345	0	0	2.367
137.002	0	0	2.584
139.893	0	0	2.902
144.624	0	0	3.026
144.986	1	0	2.782
